# Supplementary material for: Blood Ketone Bodies and Breath Acetone Analysis and Their Correlations in Type 2 Diabetes Mellitus
Source: MDPI journal article supplement (doi:10.3390/diagnostics9040224), 2019-12-17
Supplement: s1 [file s1]

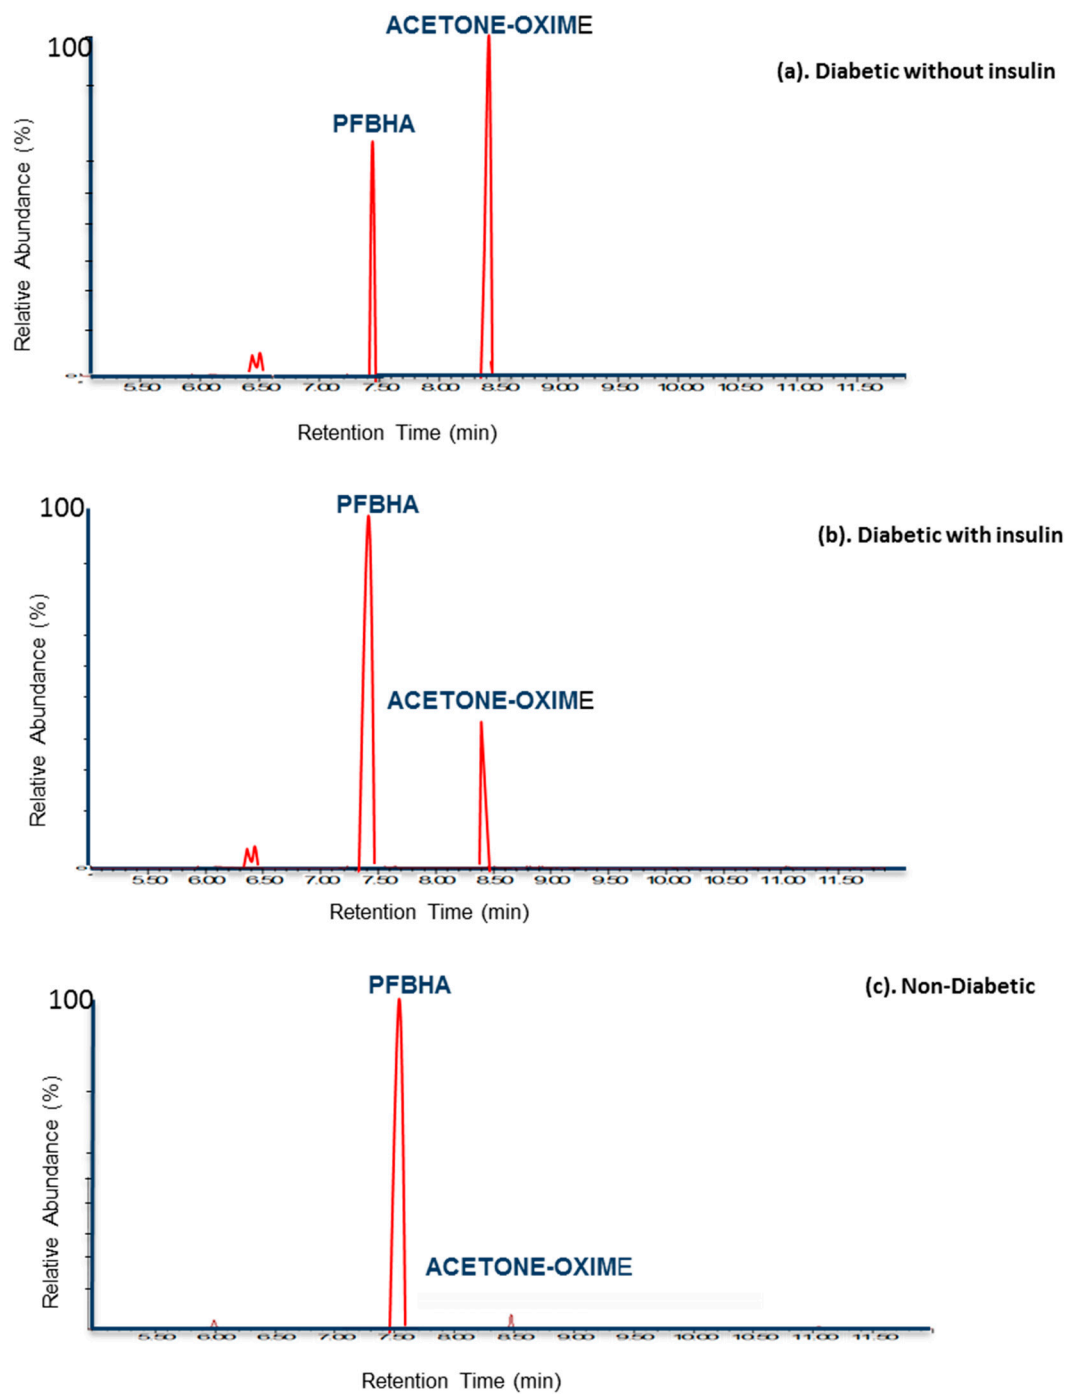

Figure S1. Reconstructed GC-MS ion chromatograms ( $m/z$  181) of patient breath samples without insulin injection (a), diabetic breath with insulin (b), and non-diabetic breath (c) sampled using on-fibre SPME derivatization with PFBHA.

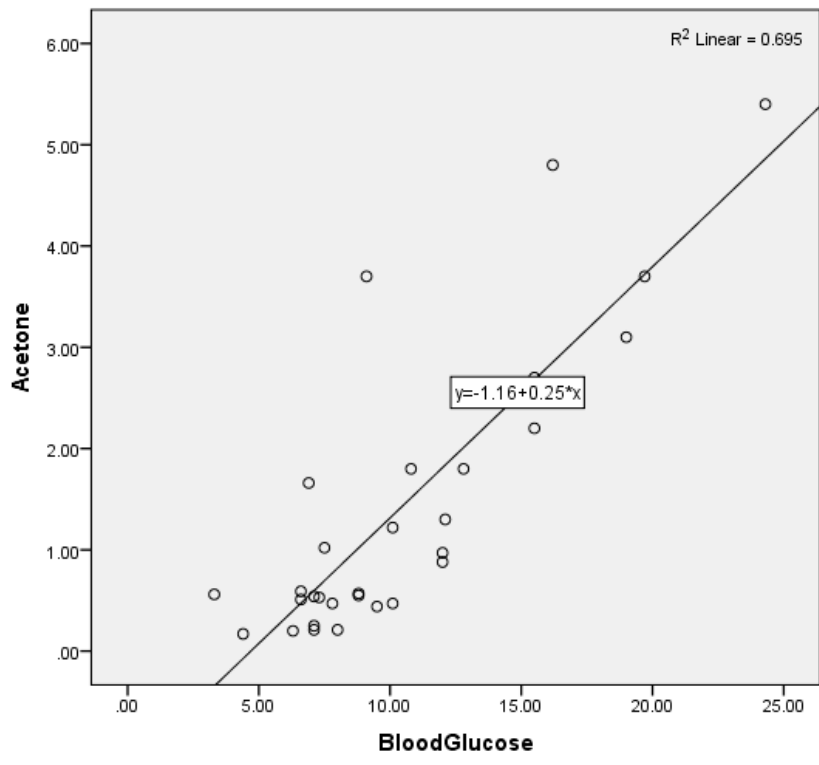

Figure S2: The measured breath acetone concentration by SPME GC/MS and versus blood glucose in diabetic patients.
